# Supplementary material for: Preparation of New Sargassum fusiforme Polysaccharide Long-Chain Alkyl Group Nanomicelles and Their Antiviral Properties against ALV-J
Source: MDPI journal article supplement (doi:10.3390/molecules26113265), 2021-05-28
Supplement: s1 [file s1]

## Supplementary material

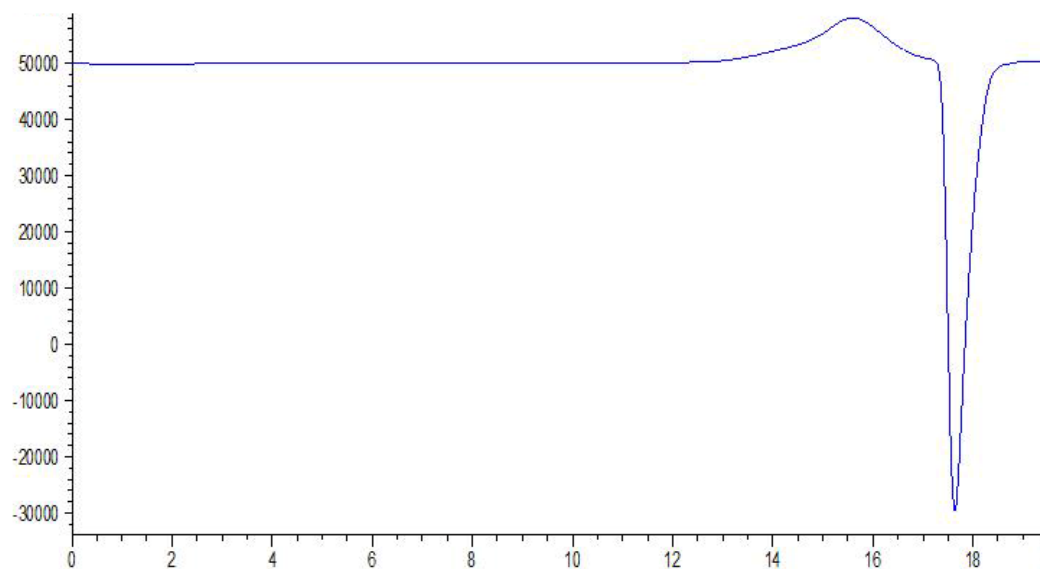

**Figure S1.** HPLC profile of SFP

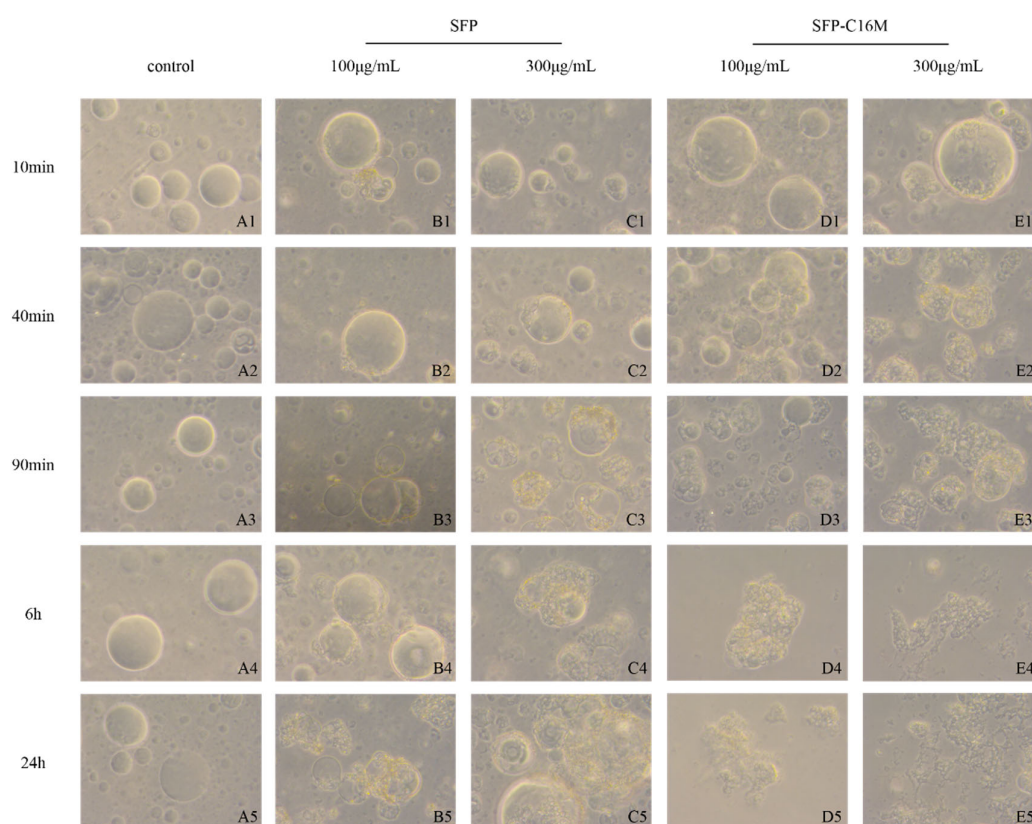

**Figure S2.** Morphology of GUVs- after 10min, 40min, 90min, 6h and 24h exposure in SFP and SFP-C16M of different concentration (100µg/mL and 300µg/mL) (200×).
